# Supplementary material for: Rehabilitation following spinal cord injury: how animal models can help our understanding of exercise-induced neuroplasticity
Source: PubMed Central journal article supplement — Neural Regen Res. 2019 Mar;14(3):405–12. doi: 10.4103/1673-5374.245951 (PMC6334617; doi:10.4103/1673-5374.245951), 2019-03
Supplement: NRR-14-405_Suppl1.pdf [file NRR-14-405_Suppl1.pdf]

## PEER-REVIEW REPORT 1

**Name of journal:** Neural Regeneration Research

**Manuscript NO:** NRR-D-18-00659

**Title:** Rehabilitation strategies to study neuronal plasticity following spinal cord injury

**Reviewer's Name:** Mitsuhiro Enomoto

**Reviewer's country:** Japan

**Date sent for review:** 2018-09-27

**Date reviewed:** 2018-10-10

**Review time:** 13 Days

1. Do you consider this paper is hotspots or important areas in the research field related to neural regeneration?

Yes

2. Which area do you think this paper falls into? Neurorepair, neuroprotection, neuroregeneration or neuroplasticity.

Neuroplasticity

3. Is the manuscript technically sound, and do the data support the conclusions?

Yes

4. Has the statistical analysis been performed appropriately and rigorously?

na

5. Is the manuscript presented in an intelligible fashion and written in Standard English?

Yes

6. Your peer review comments will be published as an open peer review report. Do you agree to have your name included with the published article?

Yes

| Manuscript Rating Question(s):                                                          | Scale | Rating |
|-----------------------------------------------------------------------------------------|-------|--------|
| The subject addressed in this article is worthy of investigation. (3 as the best score) | [1-3] | 2      |
| The information presented was new. (5 as the best score)                                | [1-5] | 4      |

### COMMENTS TO AUTHORS

This manuscript described the rehabilitation strategies to study neuronal plasticity following spinal cord injury in latest researches. This is easy to read and understand history, role and mechanism of rehabilitation after SCI. The paragraph of modulation of serotonergic fibers is interesting.

However, there are several unclear points in the text.

P9. Line 9-10

Please mention which factors relate to "These irregular spaced running wheels might serve as a trigger for the remodeling of the CST", increase of BDNF or other growth factors?

P9. Line 54-61

Please explain a detail of "epidural stimulation" in the text if authors recommend it in the conclusion.

Please check the spelling in the text.
